# Supplementary material for: A novel carboxamide bromodomain inhibitor attenuates osteoarthritis via epigenetic repression of NF-κB and MAPK signaling
Source: Frontiers journal article supplement (doi:10.3389/fimmu.2025.1633334), 2025-07-31
Supplement: Data_Sheet_1.pdf [file Data_Sheet_1.pdf]

# 1 Supplementary Figures

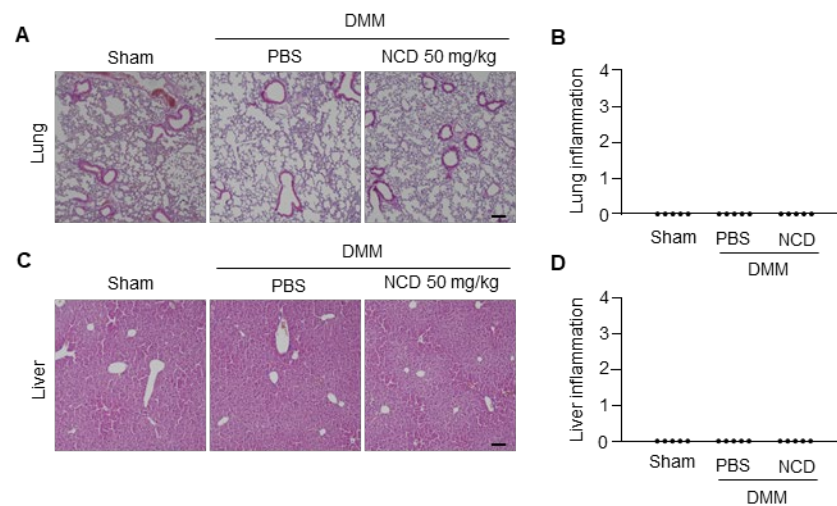

**Figure S1.** Evaluation of inflammation in lung and liver after NCD oral administration. (A-D) The lungs, and liver of the three groups (sham, DMM, and DMM+NCD 50 mg/kg) were stained to examine histological characteristics ( $n = 5$  mice/group) to evaluate the inflammation caused by long-term oral administration of NCD. The images of the lung and liver were captured under the microscope at 100  $\times$ . Scale bar = 100  $\mu$ m. Sham: control. Values were assessed using the Kruskal-Wallis and Dunn's tests.

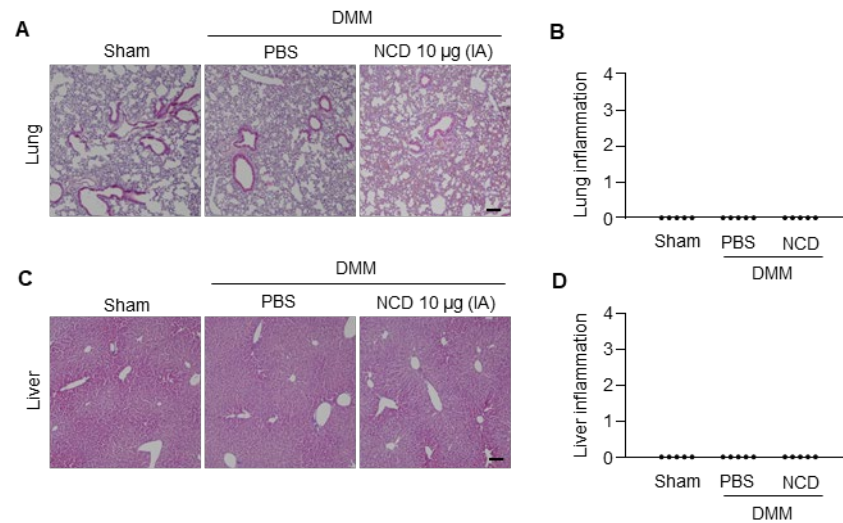

**Figure S2.** Evaluation of inflammation in lung and liver after intra articular injection of NCD. (A-D) The lungs, and liver of the three groups (sham, DMM, and DMM+NCD 50 µg) were stained to examine histological characteristics ( $n = 5$  mice/group) to evaluate the inflammation caused by intra articular injection of NCD. The images of the lung and liver were captured under the microscope at 100  $\times$ . Scale bar = 100 µm. Sham: control. Values were assessed using the Kruskal-Wallis and Dunn's tests. n.s., not significant.

16 **Supplementary table**

17 Table 1. Pharmacokinetic Parameters of NCD Following Intravenous Administration in SD Rats

| NCD                                 | Dose (mg/kg) |         |         |
|-------------------------------------|--------------|---------|---------|
|                                     | 5            | 10      | 20      |
| <b>C<sub>max</sub> (ng/ml)</b>      | 1111.52      | 2559.25 | 4150.81 |
| <b>Half-life (hour)</b>             | 0.41         | 0.59    | 0.76    |
| <b>AUC<sub>0-t</sub> (ng·hr/mL)</b> | 631.83       | 1728.88 | 4526.66 |

18

19
